# Supplementary material for: Extremely fast Au–Ag alloy–dealloy associated reversible plasmonic modifications in SiO2 films
Source: Royal Society of Chemistry journal article supplement (doi:10.1039/c5tc03123k), 2016-01-01
Supplement: c5tc03123k1.pdf [file c5tc03123k1.pdf]

Electronic Supplementary Information (ESI)

**Extremely fast Au–Ag alloy–dealloy associated reversible plasmonic modifications in SiO<sub>2</sub> films†**

Sourav Pramanik<sup>a‡</sup>, Shreyasi Chattopadhyay<sup>a‡</sup>, Jugal Kishore Das<sup>a</sup>, Unnikrishnan Manju<sup>b</sup> and Goutam De<sup>a,b\*</sup>

<sup>a</sup>Nano-Structured Materials Division, CSIR-Central Glass and Ceramic Research Institute, 196, Raja S. C. Mullick Road, Kolkata 700032, India,

<sup>b</sup>Advanced Materials Characterization Unit, CSIR-Central Glass and Ceramic Research Institute, 196, Raja S. C. Mullick Road, Kolkata 700032, India.

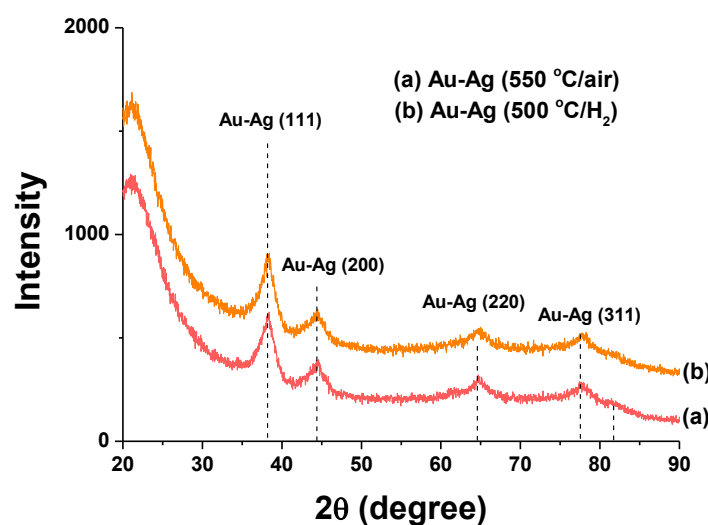

**Fig S1.** GIXRD patterns of the final heat-treated Au–Ag alloy nanoparticles incorporated SiO<sub>2</sub> films: (a) 550 °C (air), (b) 500 °C (10% H<sub>2</sub>–90% Ar). The vertical lines with relative intensities are the positions of fcc Au/Ag reflections. The patterns were recorded at room temperature (22 °C).

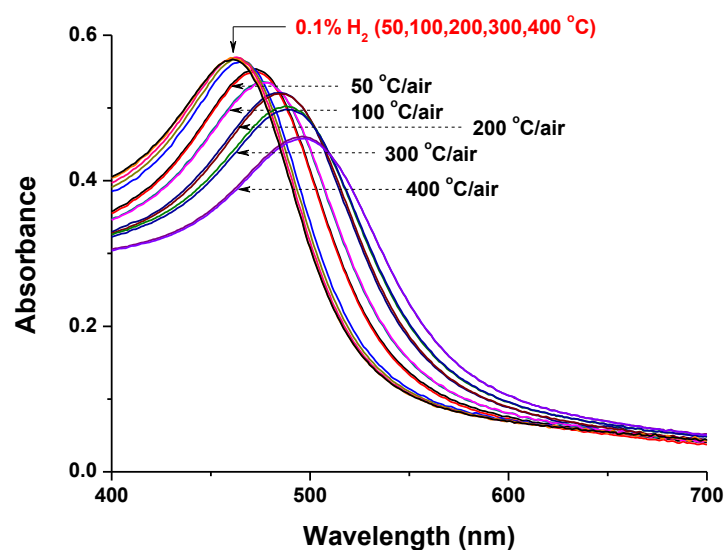

**Fig S2.** Optical spectra of the Au–Ag alloy film recorded in air–0.1% H<sub>2</sub>–air cycles at the temperature range of 50–400 °C. Recording conditions of the spectra are indicated in the body of the figure.

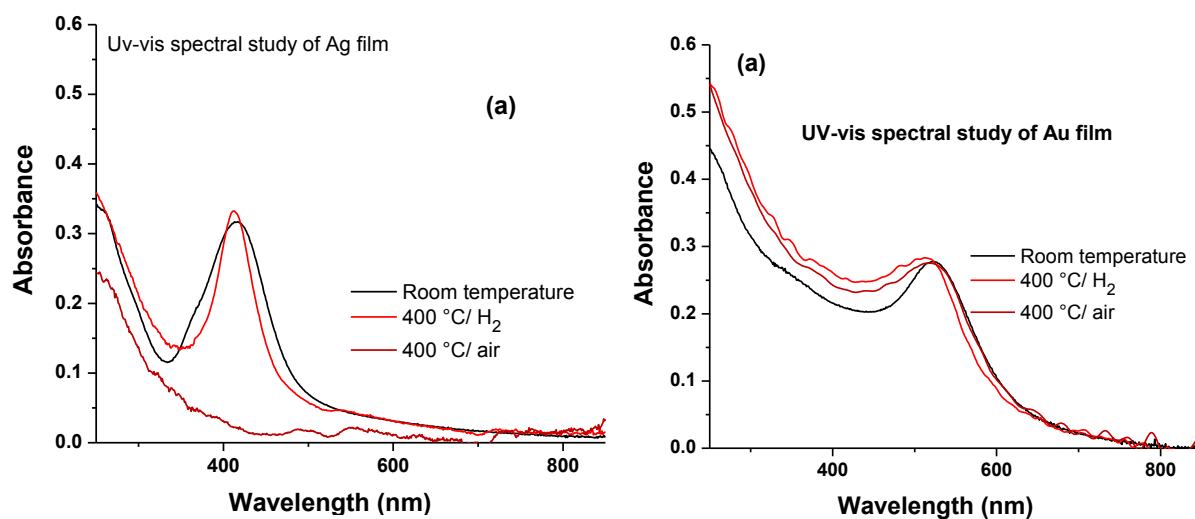

**Fig S3.** Optical spectra of the pure Ag (a) and Au (b) doped films in air and reducing (10% H<sub>2</sub>–90%) atmospheres at 400 °C.

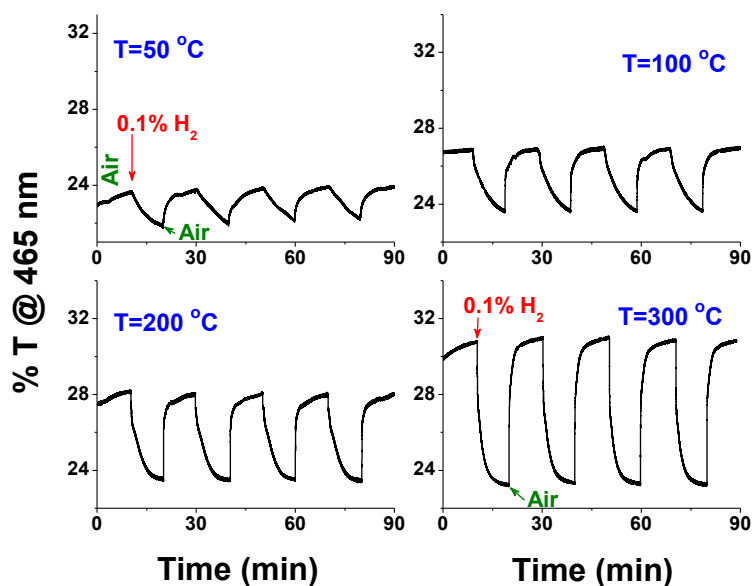

**Fig. S4** Dynamic change of SPR transmittance of the Au–Ag (1:1) film when exposed to air–0.1% H<sub>2</sub>–air cycles. The test was performed at 50, 100, 200 and 300 °C as marked in the figure and optical transmittance was recorded at 465 nm.

**Table S1** SPR peak positions and corresponding alloy composition of the Au, Ag and Au/Ag embedded SiO<sub>2</sub> films.

| Film                                          | SPR (nm) | Alloy composition<br>(calculated based on SPR<br>position) <sup>24</sup> |
|-----------------------------------------------|----------|--------------------------------------------------------------------------|
| Au<br>(500 °C; 10% H <sub>2</sub> –90% Ar)    | 524      | Au                                                                       |
| Au–Ag<br>(550 °C; air)                        | 496      | Au <sub>74</sub> Ag <sub>26</sub>                                        |
| Au–Ag<br>(500 °C; 10% H <sub>2</sub> –90% Ar) | 466      | Au <sub>48</sub> Ag <sub>52</sub>                                        |
| Ag<br>(500 °C; 10% H <sub>2</sub> –90% Ar)    | 415      | Ag                                                                       |

**Table S2** Refractive index (RI) values of the final heat-treated films deposited on one side polished Si wafer measured at room temperature and 400 °C in air and reducing (10% H<sub>2</sub>–90% Ar) atmospheres.

| Films                        | Refractive index at $\lambda = 800$ nm |              |                                     |
|------------------------------|----------------------------------------|--------------|-------------------------------------|
|                              | Room temperature                       | 400 °C (air) | 400 °C (10% H <sub>2</sub> –90% Ar) |
| Pure SiO <sub>2</sub>        | 1.417±0.003 <sup>a</sup>               | 1.324±0.002  | 1.328±0.002                         |
| Au doped SiO <sub>2</sub>    | 1.431±0.003                            | 1.332±0.002  | 1.330±0.002                         |
| Ag doped SiO <sub>2</sub>    | 1.438±0.003                            | 1.343±0.002  | 1.340±0.002                         |
| Au/Ag doped SiO <sub>2</sub> | 1.449±0.003                            | 1.380±0.002  | 1.378±0.002                         |

<sup>a</sup>RI value at 633 nm ( $\lambda$ ): 1.420±0.003.

**Table S3** Binding energy (Ag 3d<sub>5/2</sub>) values of pure Ag and Au–Ag incorporated films heat-treated under different conditions.

| Film                                          | SPR (nm) | Composition                                                                               | Ag 3d <sub>5/2</sub> (eV) |
|-----------------------------------------------|----------|-------------------------------------------------------------------------------------------|---------------------------|
| Ag(0)<br>(500 °C; 10% H <sub>2</sub> –90% Ar) | 415      | Ag                                                                                        | 368.1                     |
| Au–Ag<br>(500 °C; 10% H <sub>2</sub> –90% Ar) | 466      | Au <sup>0</sup> <sub>48</sub> Ag <sup>0</sup> <sub>52</sub>                               | 367.2                     |
| Au–Ag<br>(300 °C; air)                        | 490      | Au <sup>0</sup> <sub>48</sub> Ag <sup>0</sup> <sub>22</sub> Ag <sup>+</sup> <sub>30</sub> | 367.7                     |
